# Supplementary material
Source: ML conference proceedings conference paper supplement (https://openreview.net/forum?id=J9Rc5P4xjT)
Supplement: supplementary_material [file attachment]

---

# Container: Context Aggregation Network

---

Anonymous Author(s)

Affiliation

Address

email

## 1 Appendix

### 2 A Experimental setups

#### 3 A.1 ImageNet Classification

4 ImageNet-1k is an image classification dataset with 1000 object categories. We use the basic  
5 architecture explained in Section ?? . All models are trained with the same setting as DeiT. Depthwise  
6 convolution, MLP and CONTAINER-LIGHT are trained with 8 16G V100 GPU with each GPU  
7 processing 128 images. Transformer and CONTAINER are trained with 8 80G A100 GPU and each  
8 GPU processes 128 images. Color jitter, random erase and mixup are used as data-augmentation  
9 strategies. We use the adamW optimizer. Learning rates are calculated using the following equation:

$$lr = \frac{lr_{base} \times Batch \times N_{GPU}}{512} \quad (1)$$

10 where base learning rate is chosen to be  $5 \times e^{-4}$ . We use cosine learning schedule and warm up the  
11 model in the first 5 epochs and train for 300 epochs in total.

#### 12 A.2 Detection with RetinaNet

13 RetinaNet is a one-stage dense object detector using a feature pyramid network and focal loss. It is  
14 trained for 12 epochs, starting with a learning rate of 0.0001 which decreases by 10 at epoch 8 and  
15 11. We use adamW optimizer and set weight decay to 0.05. No gradient clip is applied. We warm up  
16 for the first 500 iterations. Models are trained with 8 V100 GPU and each GPU holds 2 images. We  
17 freeze the batch normalization parameter similar to DETR.

#### 18 A.3 Detection and Segmentation with Mask-RCNN

19 Mask-RCNN is a multi-task framework for object detection and instance segmentation. Mask-RCNN  
20 models are trained with 8 GPUs and each GPU hold 2 images. Mask-RCNN models are optimized by  
21 AdamW with a learning rate of 0.0001 and weight decay of 0.05. We warm up the first 500 iterations.  
22 BN parameters are frozen for all layers.

#### 23 A.4 Detection with DETR

24 DETR is an encoder-decoder transformer for end-to-end object detection. To improve the convergence  
25 speed and performance of DETR, SMCA-DETR propose a spatial modulated co-attention mechanism  
26 which can increase the convergence speed of DETR. Deformable DETR achieve fast convergence  
27 through deformable encoder and decoder. We compare CONTAINER-LIGHT with ResNet 50 on  
28 DETR without dilation, SMCA without multi scale and Deformable DETR without multi scale.  
29 DETR and SMCA DETR are optimized with 8 GPUs and 2 images per GPU, where as Deformable  
30 DETR uses 8 GPUs and 4 images per GPU. All models are optimized with AdamW optimizer and  
31 weight clipping. DETR, SMCA DETR and Deformable DETR all use the default parameter setting  
32 in the original code release.

| Method                    | Backbone        | mAP  | AP <sub>S</sub> | AP <sub>M</sub> | AP <sub>L</sub> |
|---------------------------|-----------------|------|-----------------|-----------------|-----------------|
| DETR [1]                  | ResNet50        | 32.3 | 10.7            | 33.8            | 53.0            |
| DETR [1]                  | CONTAINER-LIGHT | 38.9 | 16.5            | 42.2            | 60.3            |
| SMCA w/o multi-scale [2]  | ResNet50        | 41.0 | 21.9            | 44.3            | 59.1            |
| SMCA w/o multi-scale [2]  | CONTAINER-LIGHT | 44.2 | 23.8            | 47.9            | 63.1            |
| DDetr w/o multi-scale [3] | ResNet50        | 39.3 | 19.8            | 43.5            | 56.1            |
| DDetr w/o multi-scale [3] | CONTAINER-LIGHT | 43.0 | 23.3            | 46.3            | 61.2            |

Table A.1: Comparison with DETR model over training epochs, mAP, inference time and GFLOPs.

### 33 A.5 Self-supervised Learning DINO

34 DINO is a recently proposed self-supervised learning framework. We adopt the default training setup  
35 in DINO to test the performance of CONTAINER-LIGHT on self-supervised learning. We compare  
36 with ViT-S/16 model using DINO. Baseline model and CONTAINER-LIGHT are trained using 100  
37 epoches with cosine schedule for learning rate and weight decay. Learning rate at the end of warmup  
38 is 0.0005 while weight decay at the end will be kept constant to 0.4. Batch size per GPU is set to 64.  
39 We report kNN accuracy as a metric to evaluate the performance of self-supervised model.

## 40 B 1 line code change for Container-PAM

Listing 1: With just 1 line of code change in the forward pass of the Attention module within ViT, one can implement CONTAINER-PAM and obtain a +0.5 improvement on ImageNet top-1 accuracy.

```

41 class Attention(nn.Module):
42     def __init__(self, dim, num_heads=8, qkv_bias=False, qk_scale=None, attn_drop
43         =0., proj_drop=0., seq_l=196):
44
45         super().__init__()
46         self.num_heads = num_heads
47         head_dim = dim // num_heads
48         self.scale = qk_scale or head_dim ** -0.5
49
50         self.qkv = nn.Linear(dim, dim * 3, bias=qkv_bias)
51
52         #Uncomment this line for Container-PAM
53         #self.static_a =
54         #nn.Parameter(torch.Tensor(1, num_heads, 1 + seq_l, 1 + seq_l))
55         #trunc_normal_(self.static_a)
56
57         self.attn_drop = nn.Dropout(attn_drop)
58         self.proj = nn.Linear(dim, dim)
59         self.proj_drop = nn.Dropout(proj_drop)
60
61     def forward(self, x):
62         B, N, C = x.shape
63         qkv = self.qkv(x).reshape(B, N, 3, self.num_heads, C // self.num_heads).
64             permute(2, 0, 3, 1, 4)
65         q, k, v = qkv[0], qkv[1], qkv[2]
66
67         attn = (q @ k.transpose(-2, -1)) * self.scale
68         attn = attn.softmax(dim=-1)
69
70         #Uncomment this line for Container-PAM
71         #attn = attn + self.static_a
72
73         attn = self.attn_drop(attn)
74 
```

```
75     x = (attn @ v).transpose(1, 2).reshape(B, N, C)
76     x = self.proj(x)
77     x = self.proj_drop(x)
78     return x
```

81 The attention code is borrowed from the TIMM library <sup>1</sup>. The one-line code addition in the forward  
82 pass for CONTAINER-PAM is implemented (and commented) in red. This code also requires enabling  
83 an additional parameter (also shown in red).

## 84 References

- 85 [1] Nicolas Carion, Francisco Massa, Gabriel Synnaeve, Nicolas Usunier, Alexander Kirillov, and Sergey  
86 Zagoruyko. End-to-end object detection with transformers. In *ECCV*, 2020. 2
- 87 [2] Peng Gao, Minghang Zheng, Xiaogang Wang, Jifeng Dai, and Hongsheng Li. Fast convergence of detr with  
88 spatially modulated co-attention. *arXiv*, 2021. 2
- 89 [3] Xizhou Zhu, Weijie Su, Lewei Lu, Bin Li, Xiaogang Wang, and Jifeng Dai. Deformable detr: Deformable  
90 transformers for end-to-end object detection. In *ICLR*, 2021. 2

---

<sup>1</sup><https://github.com/rwightman/pytorch-image-models/tree/master/timm>
